# Supplementary material for: Psychosexual distress following routine primary human papillomavirus testing: a longitudinal evaluation within the English Cervical Screening Programme
Source: PubMed Central journal article supplement (PMC8432156; doi:10.1111/1471-0528.16460), 2020-09-02
Supplement: BJO-128-745-s004.pdf [file BJO-128-745-s004.pdf]

**Table S1.** Percentage ‘distressed’<sup>1</sup> for individual psychosexual questions by screening result group at 6-month follow-up

|                                                                                                   | % (n) ‘distressed’ |               |              |                               |                                 |                |             |
|---------------------------------------------------------------------------------------------------|--------------------|---------------|--------------|-------------------------------|---------------------------------|----------------|-------------|
|                                                                                                   | Whole sample       | Control group | HPV negative | HPV positive, normal cytology | HPV positive, abnormal cytology | HPV persistent | HPV cleared |
|                                                                                                   | n=734              | n=127         | n=176        | n=169                         | n=106                           | n=115          | n=41        |
| Have you been worried...                                                                          |                    |               |              |                               |                                 |                |             |
| ...whether you should continue having sex?                                                        | 4.5 (33)           | 2.4 (3)       | 0.6 (1)      | 5.1 (8)                       | 7.1 (7)                         | 10.5 (11)      | 7.5 (3)     |
| ...others think you have had more sexual partners than you should?                                | 5.4 (40)           | 0 (0)         | 0 (0)        | 4.9 (8)                       | 17.8 (18)                       | 12.1 (13)      | 2.6 (1)     |
| ...about whether your test result would have a bad effect on your relationship with your partner? | 5.6 (41)           | 1.7 (2)       | 0.6 (1)      | 9.4 (14)                      | 9.0 (8)                         | 13.3 (14)      | 5.6 (2)     |
| ...whether having sex will make the problem worse?                                                | 6.1 (45)           | 2.7 (3)       | 0.7 (1)      | 7.0 (11)                      | 13.0 (13)                       | 11.7 (13)      | 10.5 (4)    |
| ... that you could give the problem to a sexual partner?                                          | 9.7 (71)           | 0.9 (1)       | 0.7 (1)      | 16.5 (26)                     | 20.8 (20)                       | 18.3 (20)      | 7.7 (3)     |
| ...a sexual partner will think they can catch the problem from you?                               | 8.6 (63)           | 0 (0)         | 0.7 (1)      | 15.3 (24)                     | 16.7 (16)                       | 18.5 (20)      | 5.1 (2)     |

<sup>1</sup> Percentage of women who responded ‘Quite a lot’ or ‘Very much’ on the Likert scale
