# Supplementary material for: Psychosexual distress following routine primary human papillomavirus testing: a longitudinal evaluation within the English Cervical Screening Programme
Source: PubMed Central journal article supplement (PMC8432156; doi:10.1111/1471-0528.16460), 2020-09-02
Supplement: BJO-128-745-s007.pdf [file BJO-128-745-s007.pdf]

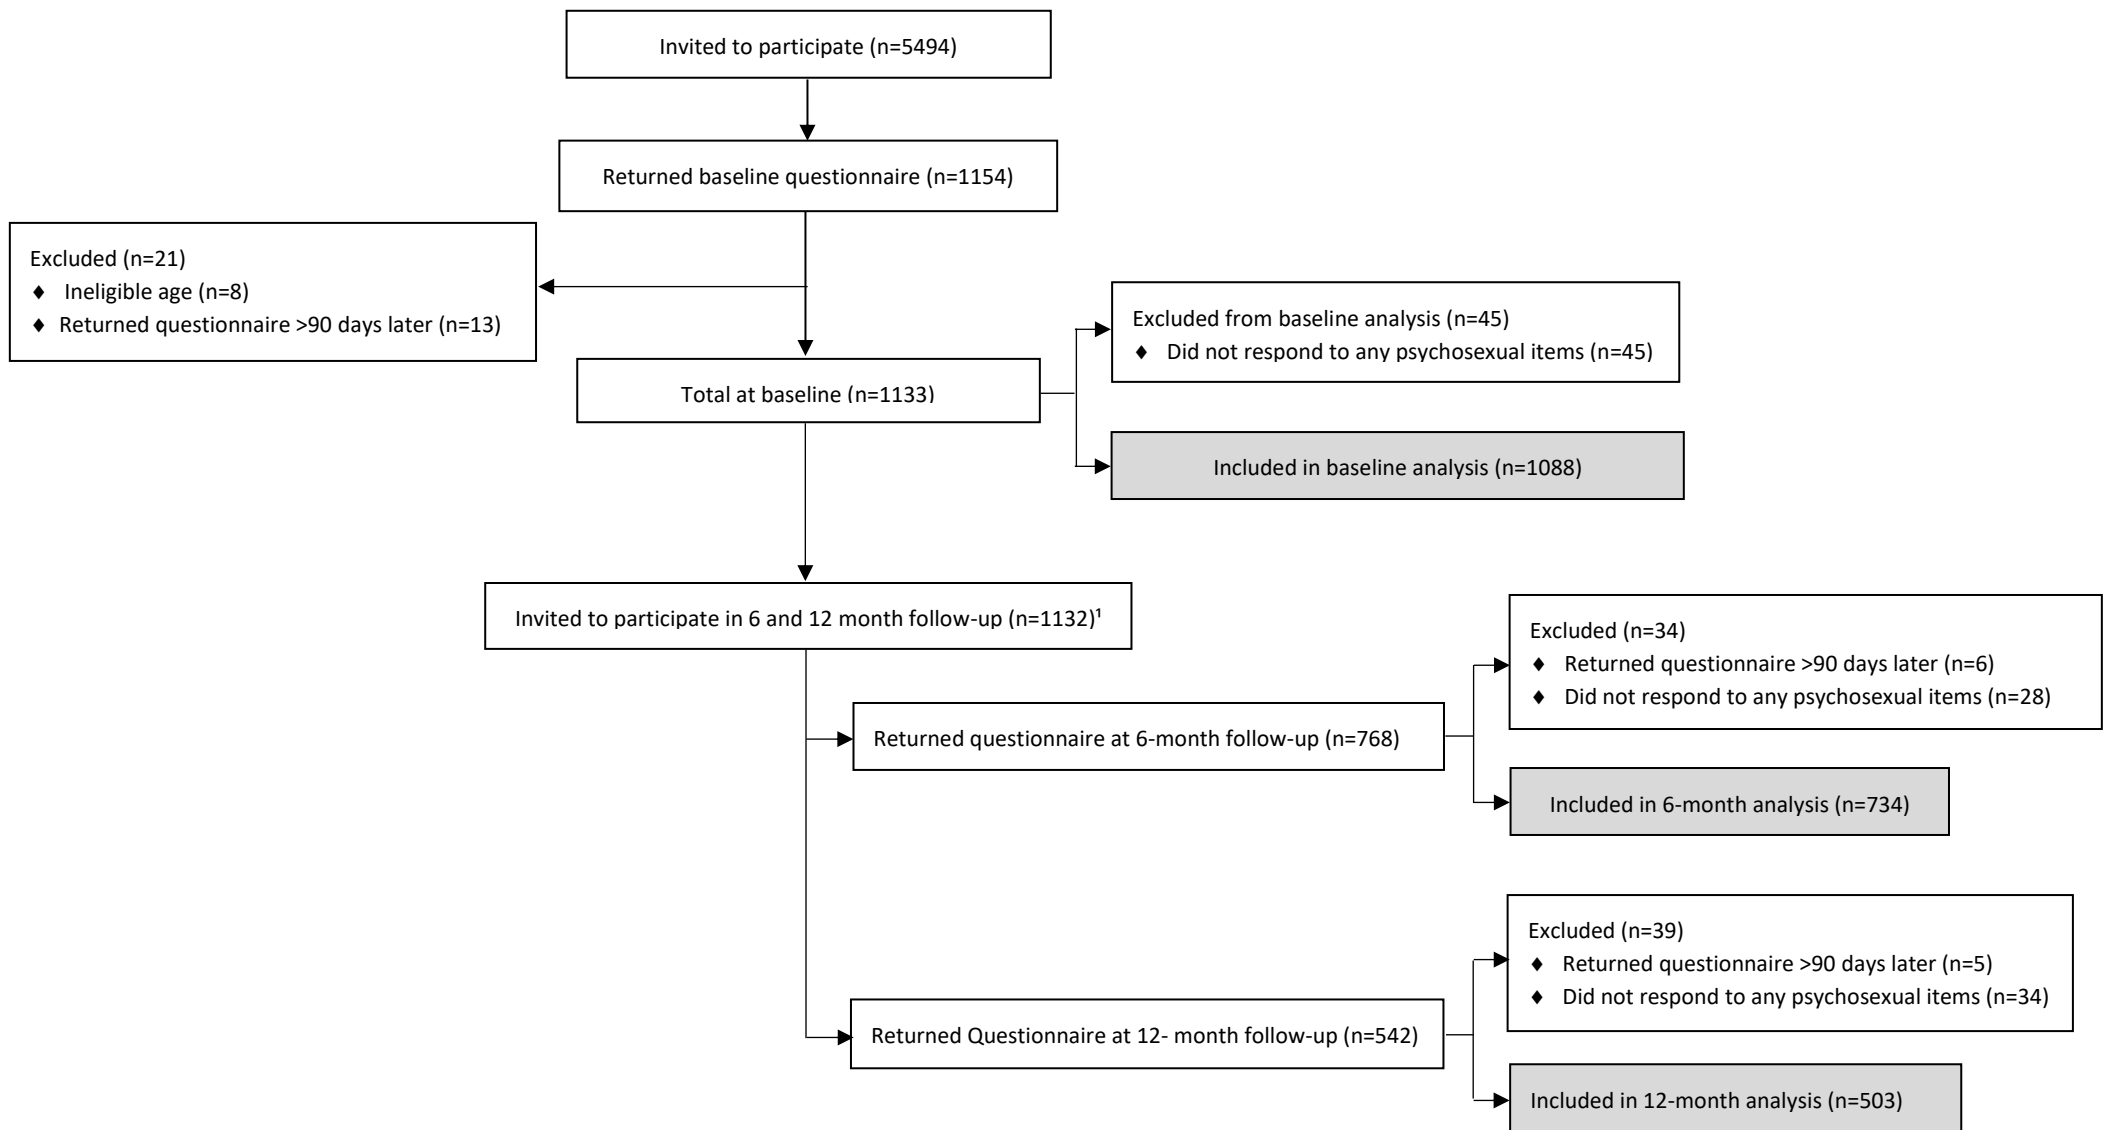

<sup>1</sup>One participant did not provide consent to be followed-up so was not invited to participate in the 6 and 12-month follow-ups.

**Figure S1.** An overview of recruitment and response
