# Supplementary material for: Psychosexual distress following routine primary human papillomavirus testing: a longitudinal evaluation within the English Cervical Screening Programme
Source: PubMed Central journal article supplement (PMC8432156; doi:10.1111/1471-0528.16460), 2020-09-02
Supplement: BJO-128-745-s009.pdf [file BJO-128-745-s009.pdf]

**Table S2.** Percentage ‘distressed’<sup>1</sup> for individual psychosexual questions by screening result group at 12-month follow-up

|                                                                                                   | % (n) ‘distressed’ |               |              |                               |                                 |                |             |
|---------------------------------------------------------------------------------------------------|--------------------|---------------|--------------|-------------------------------|---------------------------------|----------------|-------------|
|                                                                                                   | Whole sample       | Control group | HPV negative | HPV positive, normal cytology | HPV positive, abnormal cytology | HPV persistent | HPV cleared |
|                                                                                                   | n=503              | n=91          | n=115        | n=105                         | n=70                            | n=88           | n=34        |
| Have you been worried...                                                                          |                    |               |              |                               |                                 |                |             |
| ...whether you should continue having sex?                                                        | 5.8 (29)           | 1.1 (1)       | 0.9 (1)      | 12.2 (12)                     | 7.7 (5)                         | 8.5 (7)        | 9.1 (3)     |
| ...others think you have had more sexual partners than you should?                                | 6.8 (34)           | 0 (0)         | 0.9 (1)      | 10.7 (11)                     | 11.8 (8)                        | 11.8 (10)      | 11.8 (4)    |
| ...about whether your test result would have a bad effect on your relationship with your partner? | 5.0 (25)           | 0 (0)         | 0 (0)        | 14.0 (13)                     | 5.2 (3)                         | 7.2 (6)        | 9.7 (3)     |
| ...whether having sex will make the problem worse?                                                | 4.4 (22)           | 0 (0)         | 0 (0)        | 8.2 (8)                       | 7.7 (5)                         | 6.0 (5)        | 12.5 (4)    |
| ... that you could give the problem to a sexual partner?                                          | 9.1 (46)           | 0 (0)         | 0 (0)        | 23.0 (23)                     | 7.7 (5)                         | 16.3 (14)      | 12.5 (4)    |
| ...a sexual partner will think they can catch the problem from you?                               | 8.9 (45)           | 0 (0)         | 0 (0)        | 20.6 (20)                     | 10.8 (7)                        | 16.7 (14)      | 12.5 (4)    |

<sup>1</sup> Percentage of women who responded ‘Quite a lot’ or ‘Very much’ on the Likert scale
